# Supplementary material
Source: publisher figshare collection journal article supplement (https://acs.figshare.com/ndownloader/files/14890556)
Supplement: Supplementary file 1 [file 14890556]

# Supporting Information

## Micromotor-Assisted Human Serum Glucose Biosensing

*Lei Kong,<sup>a,b</sup> Nasuha Rohaizad,<sup>a,c</sup> Muhammad Zafir Mohamad Nasir,<sup>a</sup> Jianguo*

*Guan\*<sup>b</sup> and Martin Pumera\*<sup>a,d,e,f</sup>*

*<sup>a</sup>Division of Chemistry and Biological Chemistry, School of Physical and Mathematical Sciences, Nanyang Technological University, Singapore 637371, Singapore*

*<sup>b</sup>State Key Laboratory of Advanced Technology for Materials Synthesis and Processing, Wuhan University of Technology, Wuhan 430070, People's Republic of China; guanjk@whut.edu.cn*

*<sup>c</sup>NTU Institute for Health Technologies, Interdisciplinary Graduate School, Nanyang Technological University, Singapore 637553, Singapore*

*<sup>d</sup>Center of Advanced Functional Nanorobots, Department of Inorganic Chemistry, University of Chemistry and Technology Prague, Technická 5, 166 28 Prague 6, Czech Republic; pumera.research@gmail.com*

*<sup>e</sup>Department of Chemical and Biomolecular Engineering, Yonsei University, 50 Yonsei-ro, Seodaemun-gu, Seoul 03722, Korea*

*<sup>f</sup>Future Energy and Innovation Laboratory, Central European Institute of Technology, Brno University of Technology, Purkyňova 656/123, Brno, CZ-616 00, Czech Republic*

## **Table of Contents**

**Figure S1.** Digital photograph of experimental setup.

**Figure S2.** Chronoamperometric measurements for glucose with Mg/Pt Janus micromotors.

**Figure S3.** The current difference obtained for Mg/Pt micromotors, Mg and Pt particles without glucose.

**Figure S4.** Optical microscope images and current difference obtained with different concentrations of Mg/Pt Janus micromotors.

**Figure S5.** Trajectories of Mg/Pt Janus micromotors in different concentrations of glucose.

**Table S1.** Calculated  $\Delta I'$  for different concentrations of glucose and Mg/Pt Janus micromotors.

**Video S1.** Motion of Mg/Pt Janus micromotors in the running solution containing HS/PBS-FcMeOH or HS/PBS-FcMeOH with 1 mM glucose (AVI).

**Video S2.** Mg microparticles in HS/PBS-FcMeOH solution (AVI).

**Video S3.** Motion of Mg/Pt Janus micromotors in the running solution containing HS/PBS-FcMeOH with 2 mM, 5 mM, 10 mM or 15 mM glucose (AVI).

### S1. Supporting figures

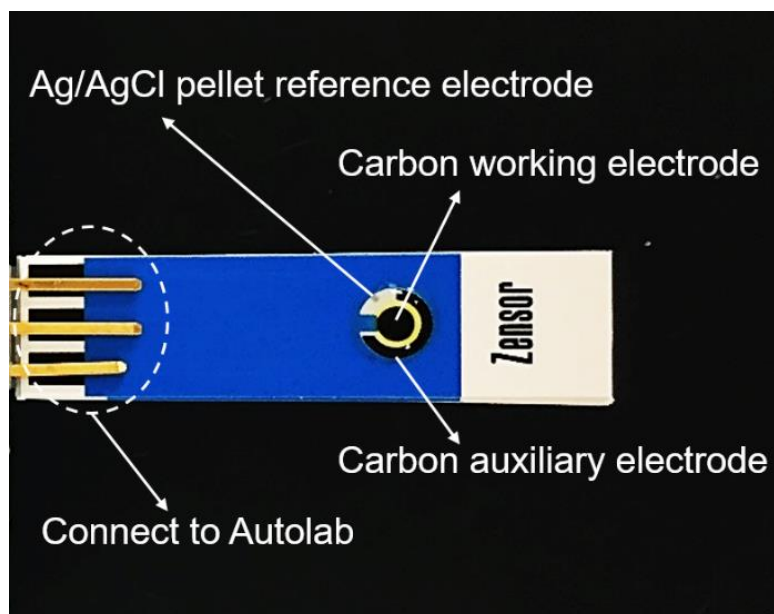

**Figure S1.** Digital photograph of screen-printed electrode (SPE) and experimental setup.

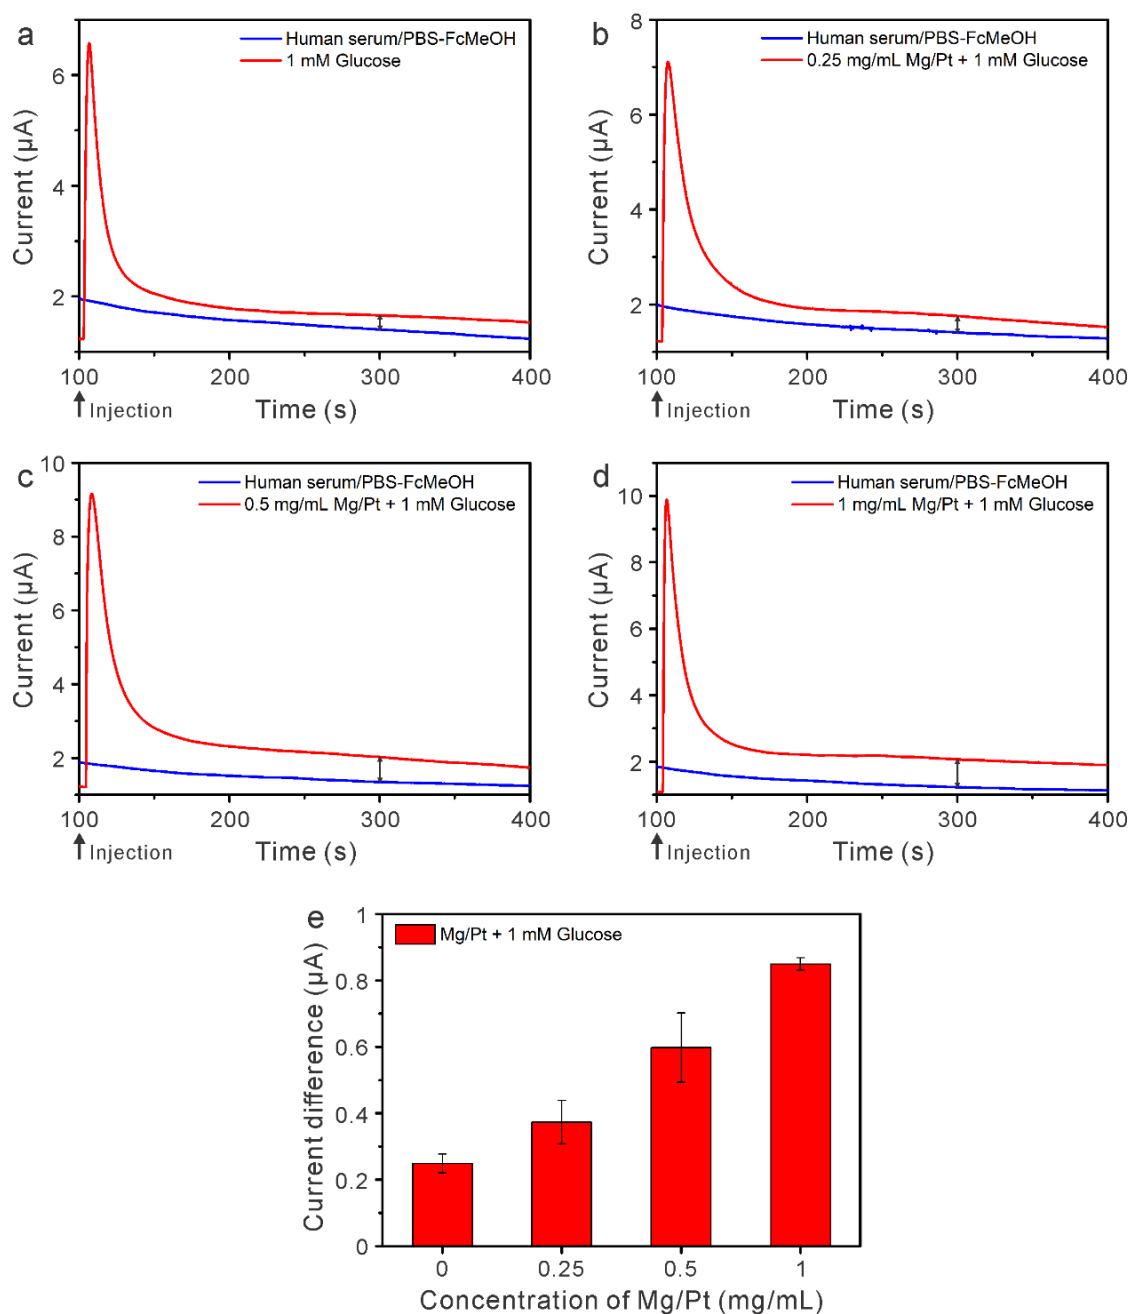

**Figure S2.** (a-d) Chronoamperometric measurements of HS/PBS-FcMeOH with 1 mM glucose solution and different concentrations of Mg/Pt Janus micromotors. Arrow represents the time for injection of glucose and micromotors mixture. Current signals were measured at time of 300 s. (e) Compilation of current difference ( $\Delta I$ ) calculated at 300 s with equation (5) at different concentrations of Mg/Pt Janus micromotors.

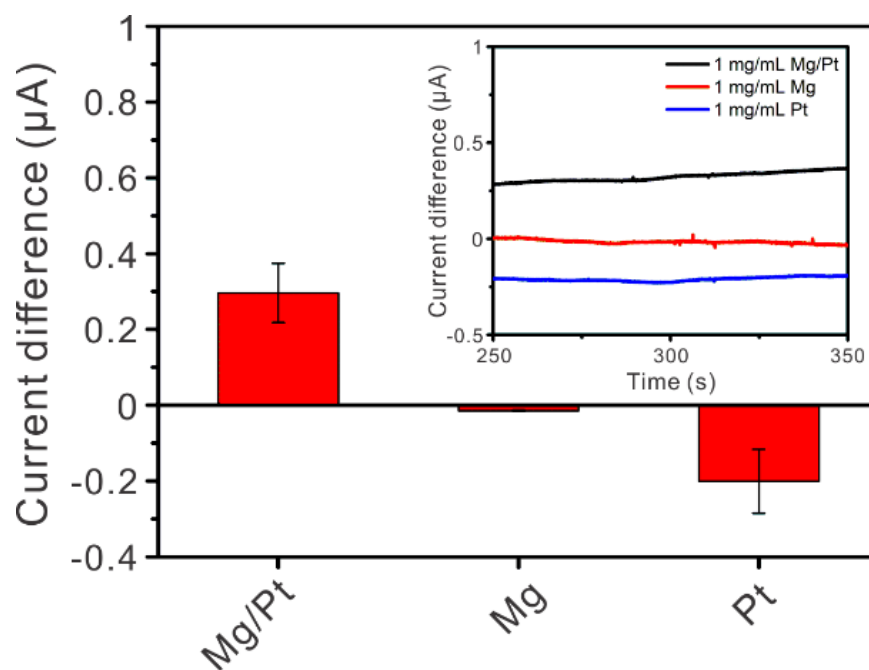

**Figure S3.** The current difference ( $\Delta I$ ) at 300 s obtained for Mg/Pt micromotors, Mg and Pt microparticles in PBS-FcMeOH. The inset shows chronoamperometric measurements obtained from 250 s to 350 s.

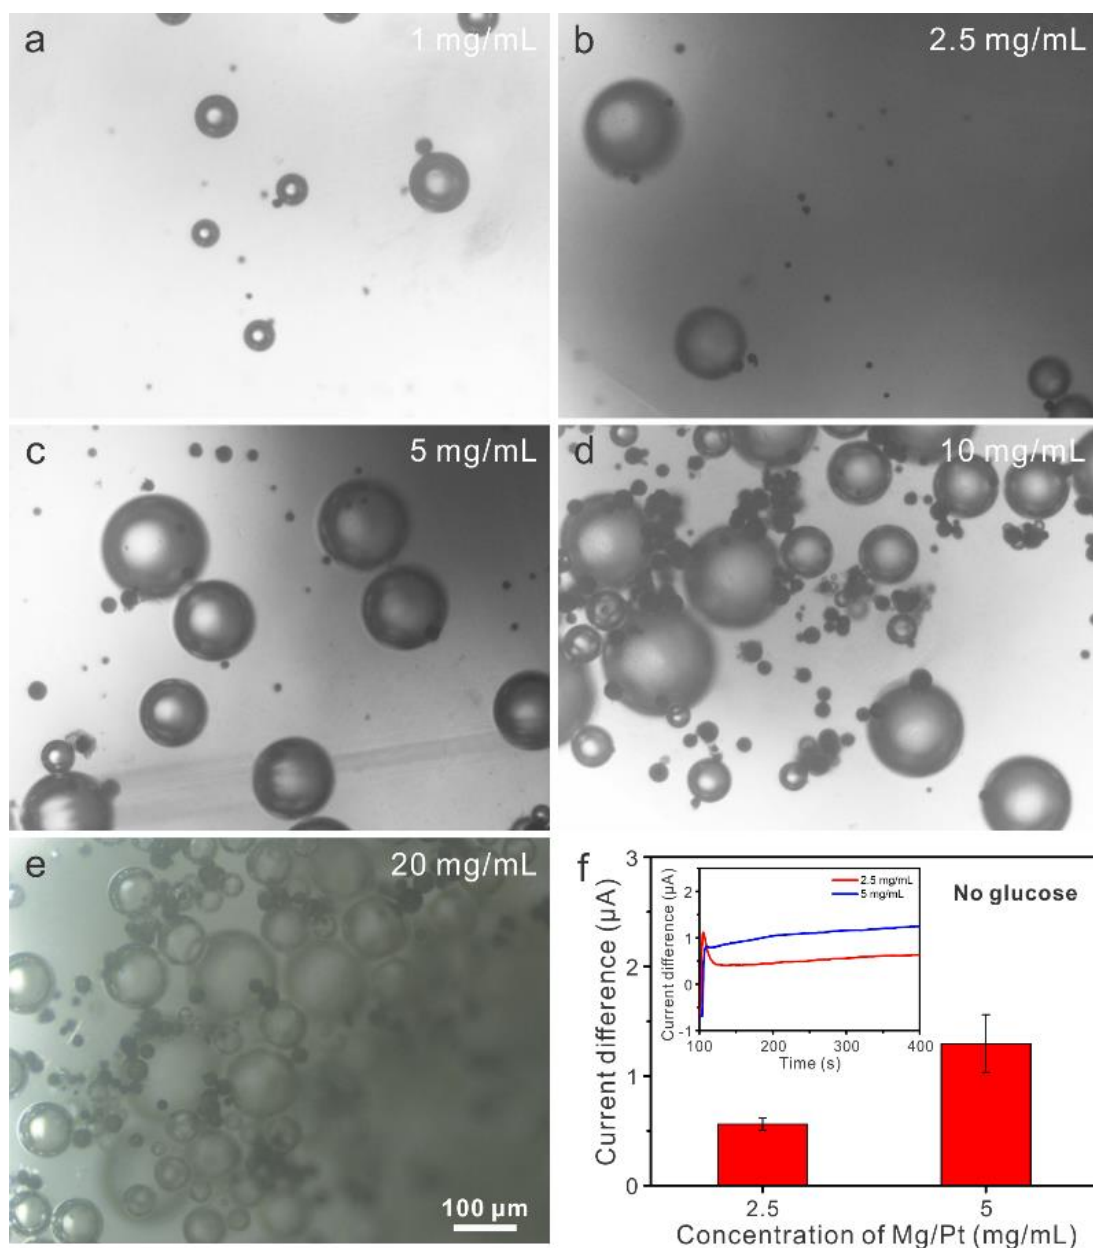

**Figure S4.** Optical microscope images at Mg/Pt Janus particles concentrations of (a) 1 mg/mL, (b) 2.5 mg/mL, (c) 5 mg/mL, (d) 10 mg/mL and (e) 20 mg/mL. (f) The current difference ( $\Delta I$ ) at Mg/Pt Janus micromotors concentrations of 2.5 mg/mL and 5 mg/mL in the absence of glucose. The inset shows the chronoamperometric measurements obtained.

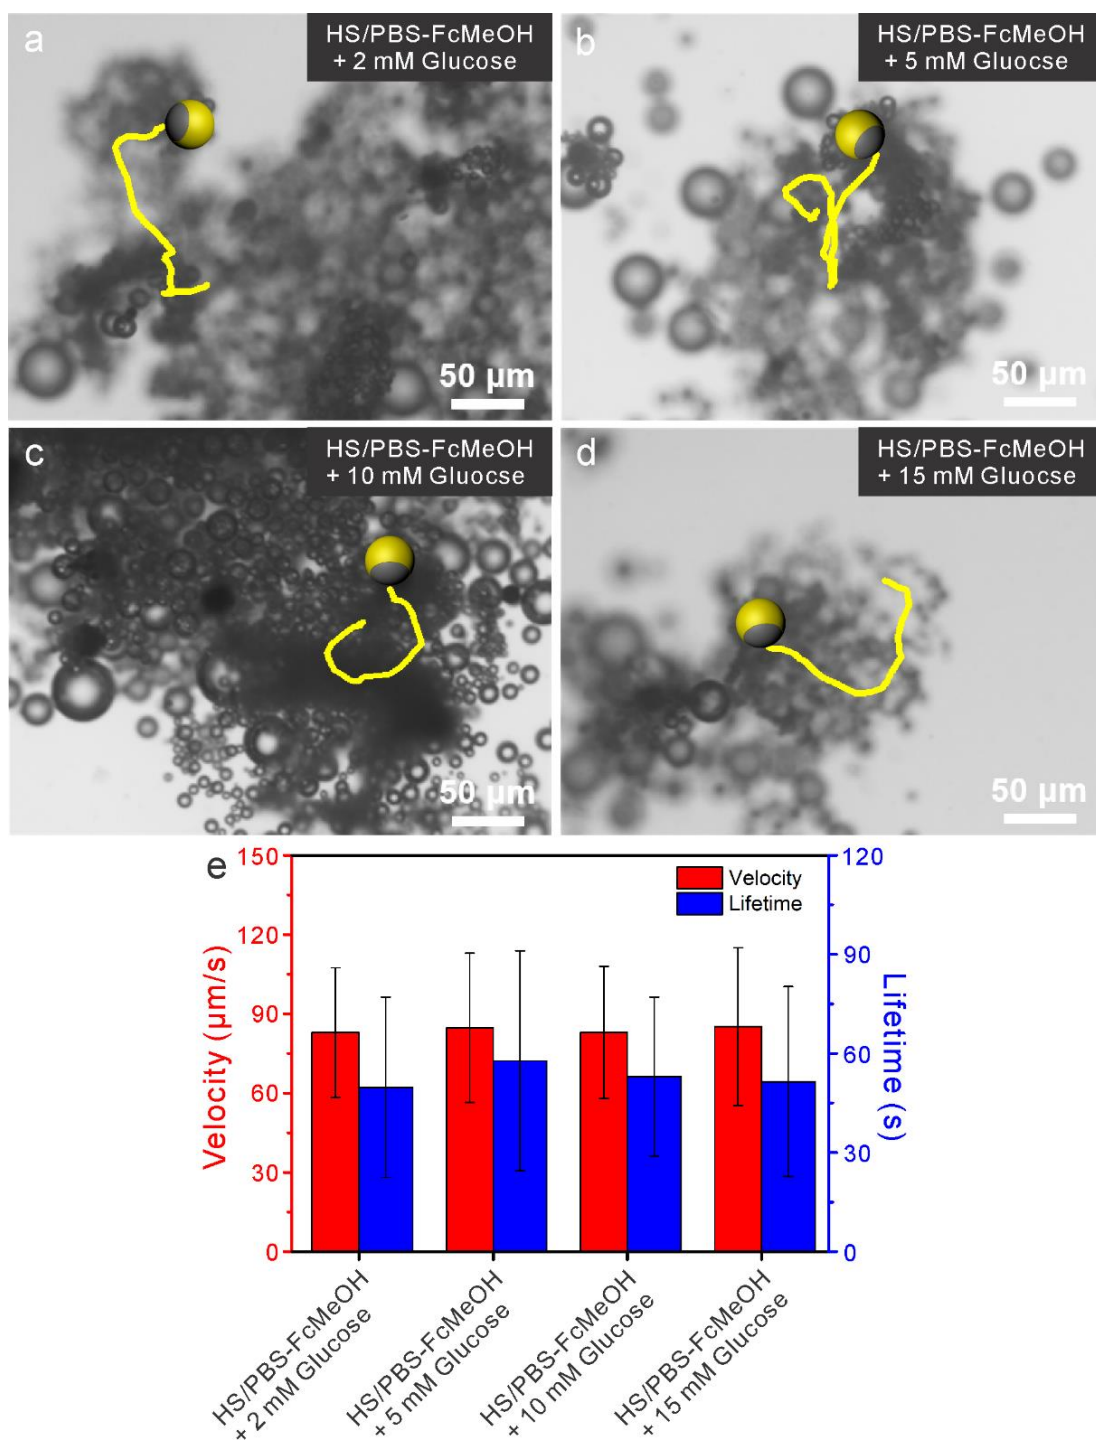

**Figure S5.** Trajectories of Mg/Pt Janus micromotors in HS/PBS-FcMeOH at (a) 2 mM, (b) 5 mM, (c) 10 mM and (d) 15 mM glucose concentrations for duration of 3 s. (e) The average velocities and lifetimes of Mg/Pt Janus micromotors in above experimental conditions.

**Table S1.** Calculated  $\Delta I'$  at different concentrations of Mg/Pt Janus micromotors and glucose.

| Glucose (mM) | Mg/Pt (0 mg/mL) | Mg/Pt (1 mg/mL) | Mg/Pt (2.5 mg/mL) |
|--------------|-----------------|-----------------|-------------------|
| 1            | 0.25            | 0.36            | 0.65              |
| 2            | 1.01            | 1.26            | 1.48              |
| 5            | 4.04            | 4.52            | 4.91              |
| 10           | 17.44           | 18.22           | 19.43             |
| 15           | 20.67           | 22.6            | 24.54             |

## S2. Supporting videos

**Video S1.** Motion of Mg/Pt Janus micromotors in the running solution containing HS/PBS-FcMeOH or HS/PBS-FcMeOH with 1 mM glucose (AVI).

**Video S2.** Mg microparticles in HS/PBS-FcMeOH solution (AVI).

**Video S3.** Motion of Mg/Pt Janus micromotors in the running solution containing HS/PBS-FcMeOH with 2 mM, 5 mM, 10 mM or 15 mM glucose (AVI).
